# Supplementary material for: Annealing Effects on SnO2 Thin Film for H2 Gas Sensing
Source: MDPI journal article supplement (doi:10.3390/nano12183227), 2022-09-16
Supplement: s1 [file s1]

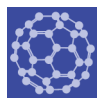

Supplementary material for

# Annealing Effects on SnO<sub>2</sub> Thin Film for H<sub>2</sub> Gas Sensing

Yijun Yang <sup>1,†</sup>, Bohee Maeng <sup>1,†</sup>, Dong Geon Jung <sup>1</sup>, Junyeop Lee <sup>1,2</sup>, Yeongsam Kim <sup>1</sup>, JinBeom Kwon <sup>1</sup>,  
Hee Kyung An <sup>1</sup> and Daewoong Jung <sup>1,\*</sup>

<sup>1</sup> Advanced mechatronics R&D Group, Korea Institute of Industrial Technology (KITECH), Daegu 42994, Korea

<sup>2</sup> School of Electronic and Electrical Engineering, College of IT Engineering, Kyungpook National University, 80 Daehakro, Daegu 41566, Korea

\* Correspondence: dwjung@kitech.re.kr; Fax: +82-53-580-0160

† These authors contributed equally to this work.

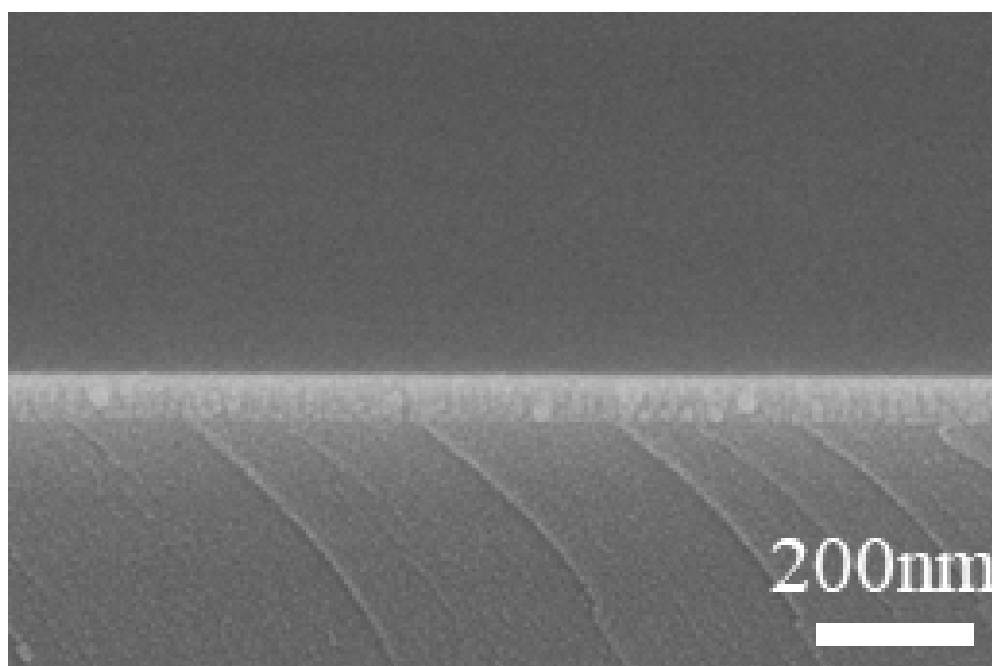

**Figure S1.** Cross-section SEM image of unannealed SnO<sub>2</sub>.

The thickness of film which is not annealed SnO<sub>2</sub> is about 55.6 nm by SEM cross-section image.

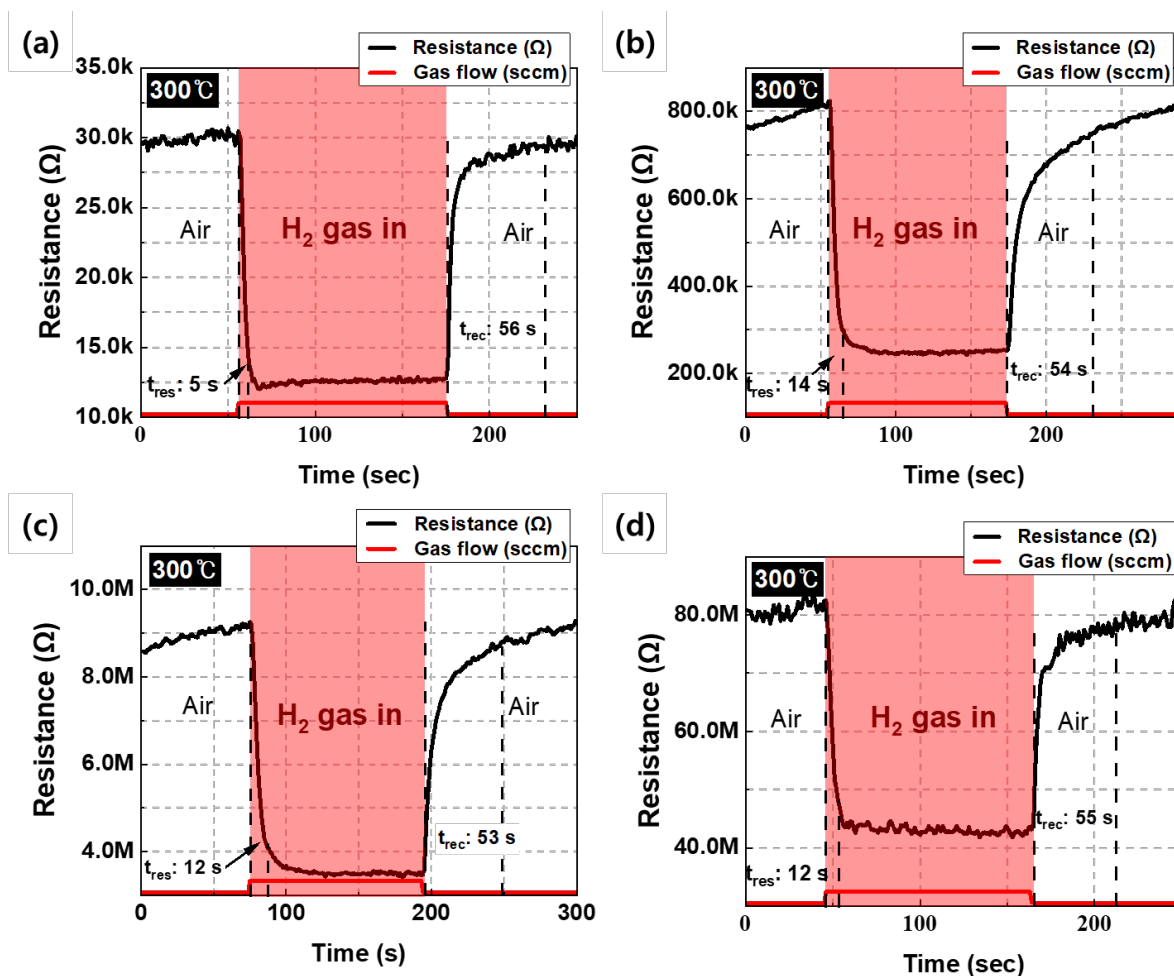

**Figure S2.** Hydrogen response and recovery time of (a) unannealed SnO<sub>2</sub> (b) 1-hour annealed SnO<sub>2</sub> (c) 3-hour annealed SnO<sub>2</sub> (d) 5-hour annealed SnO<sub>2</sub>.

The resistance of the film is increased for annealing time at 300°C indicating about 35k, 800k, 9M, and 80M for not-annealed, 1-h, 3-h, and 5-h each. As annealing temperature increases, the initial resistance of SnO<sub>2</sub> increases for some point, but after the inflection point it decreases [1].

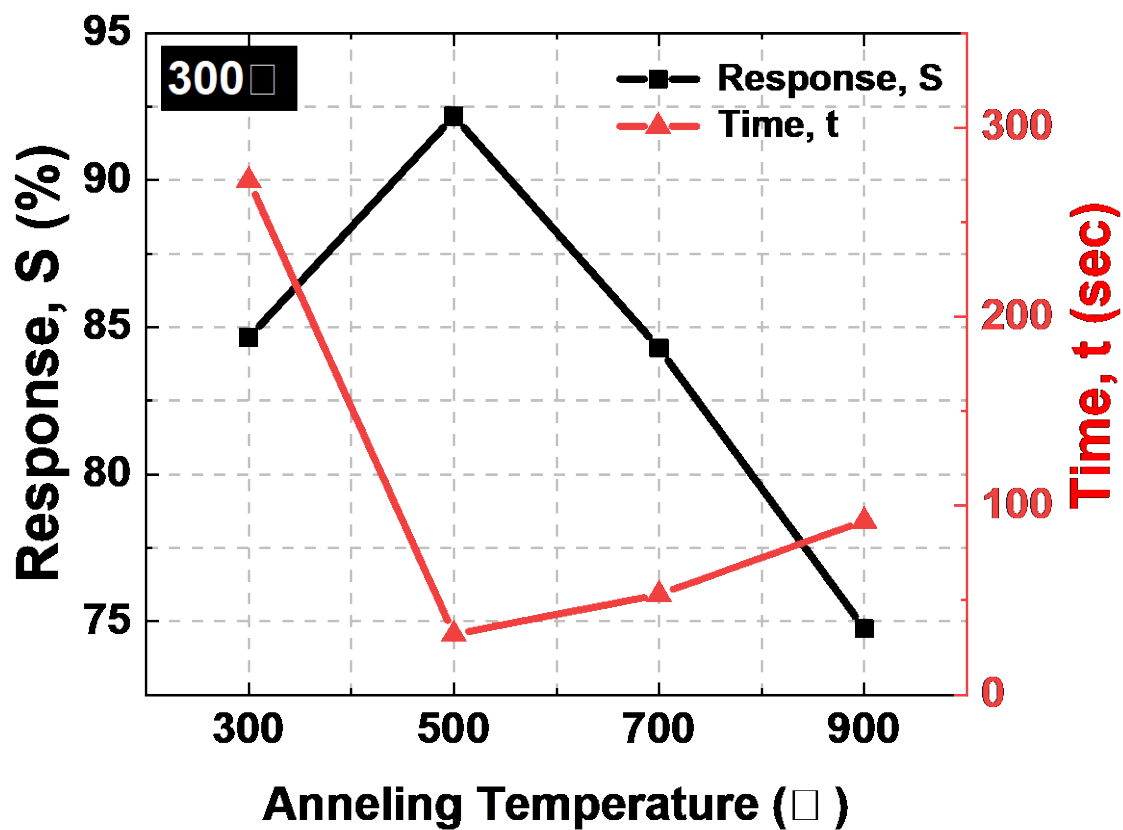

Figure S3. Hydrogen response and time for annealing temperature.

## References

- [1] Kang, K.M.; Choi, J.U. Growth characteristic of SnO<sub>2</sub> thin film for gas sensor with annealing treatment, J. Kor. Inst. Surf. Eng. 2007, 6, 258-261.
